# Supplementary material
Source: publisher figshare collection journal article supplement (https://acs.figshare.com/ndownloader/files/15611333)
Supplement: Supplementary file 1 [file 15611333]

## SUPPORTING INFORMATION

### **Halochromic switch from the 1<sup>st</sup> to 2<sup>nd</sup> Near Infrared window of Diazapentalene-Dithienosilole copolymers**

Wissem Khelifi<sup>a</sup>, Hussein Awada<sup>a</sup>, Katarzyna Brymora<sup>b</sup>, Sylvie Blanc<sup>a</sup>, Lionel Hirsch<sup>c</sup>,  
Frédéric Castet<sup>b</sup>,

Antoine Bousquet<sup>\*a</sup>, Christine Lartigau-Dagron<sup>\*a</sup>

<sup>a</sup> CNRS/ Univ Pau & Pays Adour/ E2S UPPA, Institut des Sciences Analytiques et de  
Physicochimie pour l'Environnement et les Matériaux, UMR 5254, 64000, PAU, FRANCE

<sup>b</sup> Institut des Sciences Moléculaires (ISM, UMR CNRS 5255), Université de Bordeaux, 351  
cours de la Libération, 33405 Talence, France

<sup>c</sup> Laboratoire de l'Intégration du Matériau au Système (IMS, UMR CNRS 5218), Université de  
Bordeaux, ENSCBP, 16 Avenue Pey-Berland, 33607 Pessac Cedex, France

Corresponding authors: [antoine.bousquet@univ-pau.fr](mailto:antoine.bousquet@univ-pau.fr) or [christine.lartigau-dagron@univ-pau.fr](mailto:christine.lartigau-dagron@univ-pau.fr)

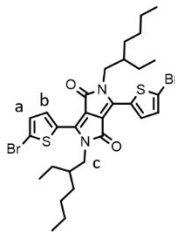

DPPSeh-Br    CDCl<sub>3</sub>

7.789  
7.778  
7.246  
7.202  
7.192  
3.511  
3.496  
3.454  
3.438  
2.760  
1.781  
1.766  
1.502  
1.493  
1.484  
1.476  
1.468  
1.459  
1.414  
1.403  
1.385  
1.365  
1.349  
1.332  
1.316  
1.240  
0.978

7.789  
7.778  
7.246  
7.202  
7.192

a b c

7.9 7.8 7.7 7.6 7.5 7.4 7.3 7.2 ppm

1.00 0.96

9.5 9.0 8.5 8.0 7.5 7.0 6.5 6.0 5.5 5.0 4.5 4.0 3.5 3.0 2.5 2.0 1.5 1.0 0.5 ppm

1.00 0.96 2.36 1.09 14.30 8.50

**Figure SI2:  $^1\text{H}$  NMR spectrum of DAP monomer ( $\text{CDCl}_3$ , 400 MHz)**

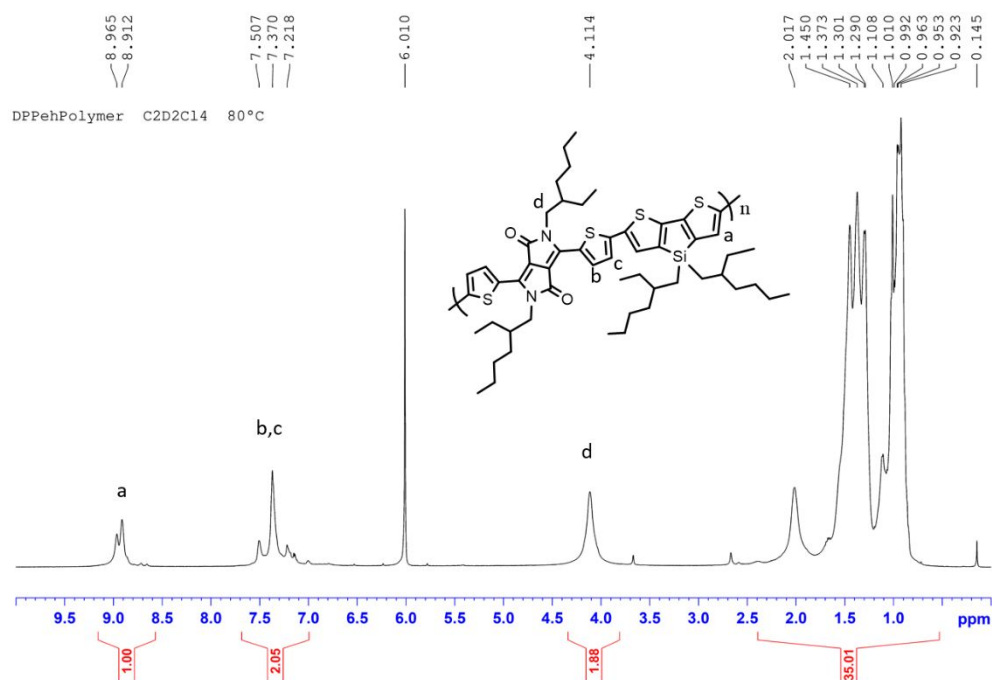

Figure SI3:  $^1\text{H}$  NMR spectrum of P(DPP-DTS) ( $\text{C}_2\text{D}_2\text{Cl}_4$ , 400 MHz)

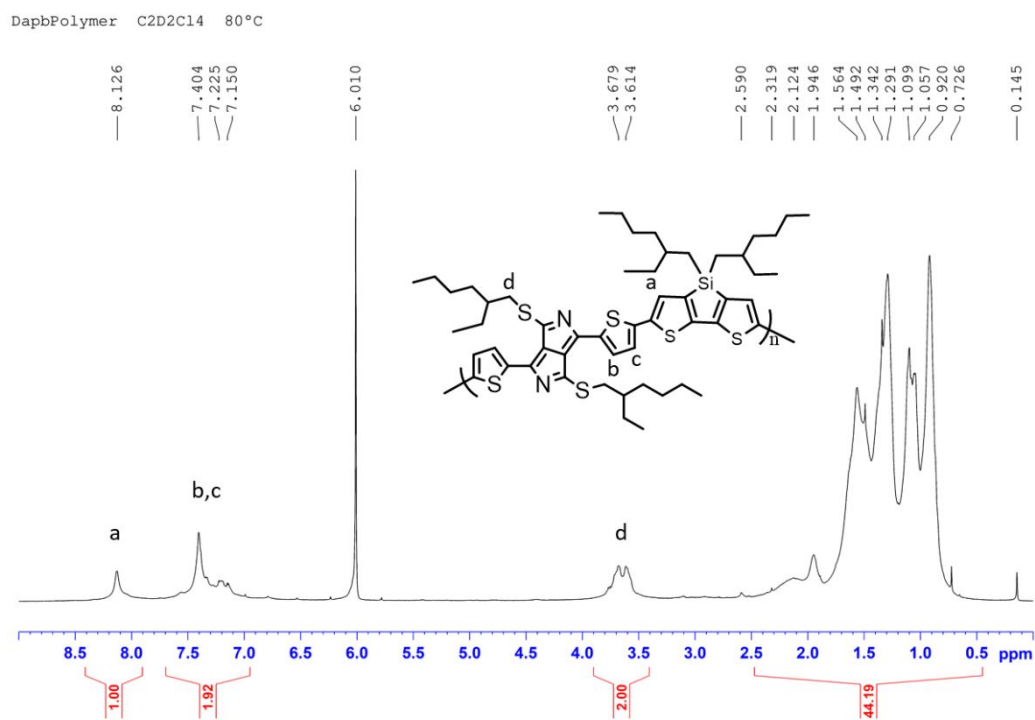

Figure SI4:  $^1\text{H}$  NMR spectrum of P(DAP-DTS) ( $\text{C}_2\text{D}_2\text{Cl}_4$ , 400 MHz)

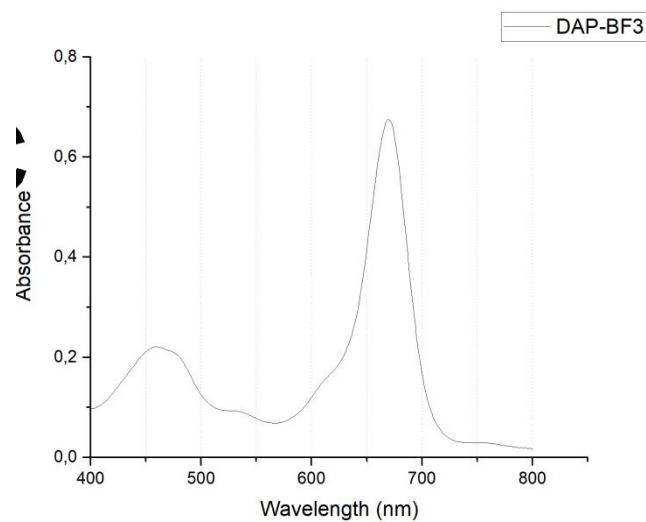

**Figure SI5: UV-visible Absorption spectrum of DAP-BF<sub>3</sub> in chloroform solution**

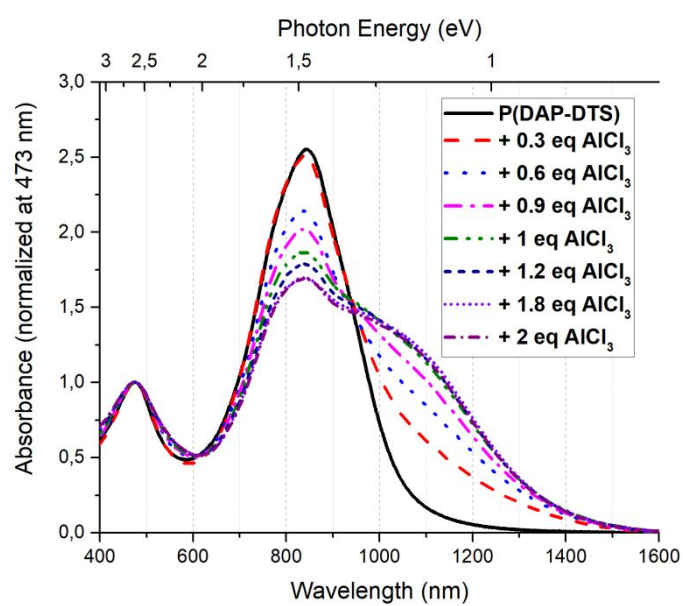

**Figure SI6: UV-visible Absorption spectra of P(DAP-DTS)-AlCl<sub>3</sub> in chloroform solution.**

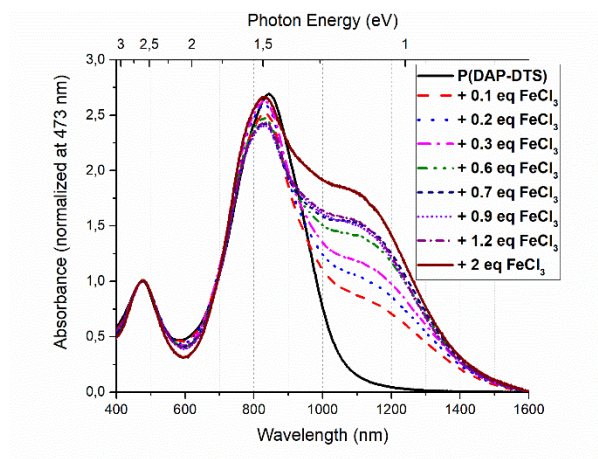

**Figure SI7: UV-visible Absorption spectra of P(DAP-DTS)-FeCl<sub>3</sub> in a chloroform solution.**

**Cyclic Voltammetry (CV).** A standard three-electrode electrochemical setup (AUTOLAB PGSTAT 101) consisting of a glassy carbon or a platinum disk as working electrode (2 mm diameter), a platinum foil as counter electrode, and a Ag/AgCl as reference electrode, was used in the electrochemical experiments. At the end of each experiment performed in CH<sub>3</sub>CN/Bu<sub>4</sub>NPF<sub>6</sub> (0,1 M), the standard potential of the ferrocenium/ferrocene couple,  $E_{Fe}$ , was measured, and all potentials were referenced against SCE using a previous determination of  $E_{Fe} = 0.41$  V versus SCE in CH<sub>3</sub>CN.(ref 1) Polymers were drop casted from a 10 mg/mL polymer solution in chlorobenzene/Bu<sub>4</sub>NPF<sub>6</sub> (0,1 M) on the working electrode. CV gives direct information of the oxidation and reduction potentials of materials. The oxidation process corresponds to removal of the electron from the HOMO energy level, while the reduction corresponds to electron addition to the LUMO energy level of the material. Therefore HOMO and LUMO energy levels can be estimated using the empirical equations:  $E_{HOMO} = - (E_{ox} + 4,7)$  and  $E_{LUMO} = - (E_{red} + 4,7)$ , where  $E_{ox}$  and  $E_{red}$  are respectively the onset potentials for oxidation and reduction peaks relative to SCE and 4,7 the factor connecting SCE to vacuum.(ref 2<sup>[1]</sup>). The onset potentials are determined by the tangent method (see supporting information). Only values from the first sweep on a film were used as the film is changed or destroyed during the first oxidation. The scan rate used was 0.1 V.s<sup>-1</sup>.

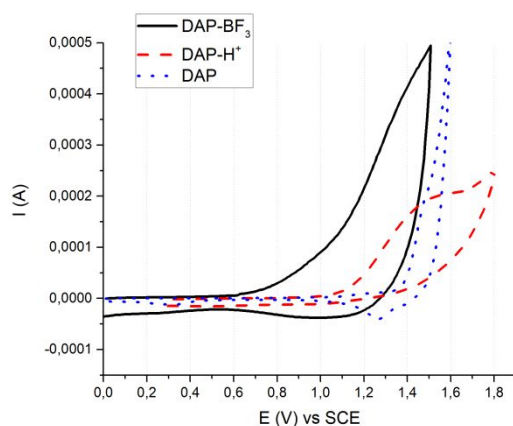

**Figure SI8: CV oxidation voltammograms of monomers films performed in 0.1 M  $\text{Bu}_4\text{NPF}_6/\text{CH}_3\text{CN}$  using a sweep rate of  $0.1 \text{ V.s}^{-1}$ .**

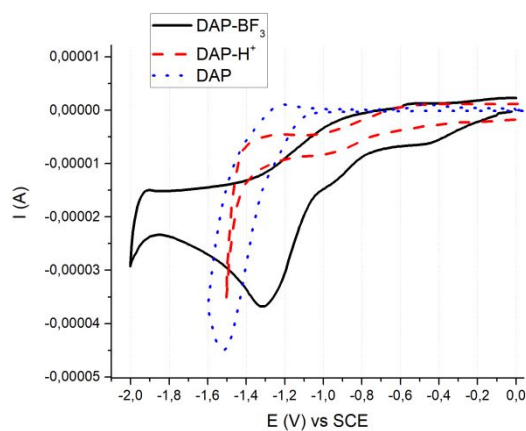

**Figure SI9: CV reduction voltammograms of monomers films performed in 0.1 M  $\text{Bu}_4\text{NPF}_6/\text{CH}_3\text{CN}$  using a sweep rate of  $0.1 \text{ V.s}^{-1}$ .**

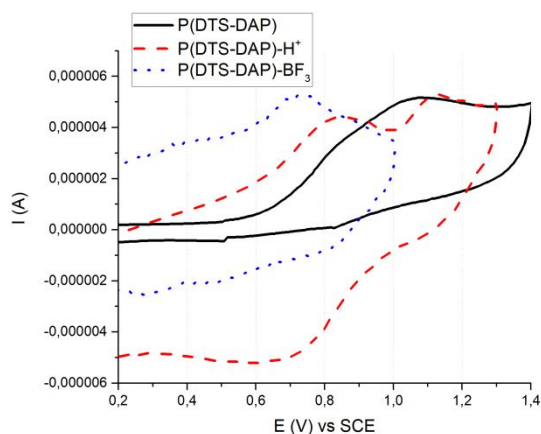

**Figure SI10: CV oxidation voltammograms of polymers P(DTS-DAP) films performed in 0.1 M  $\text{Bu}_4\text{NPF}_6/\text{CH}_3\text{CN}$  using a sweep rate of  $0.1 \text{ V.s}^{-1}$ .**

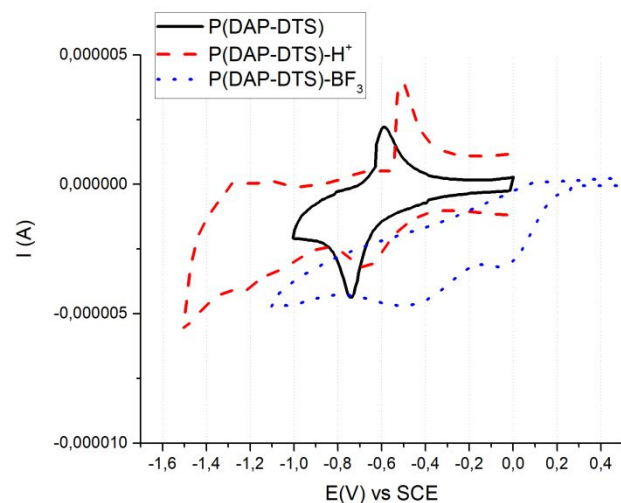

**Figure SI11: CV reduction voltammograms of polymers P(DTS-DAP) films performed in 0.1 M Bu<sub>4</sub>NPF<sub>6</sub>/CH<sub>3</sub>CN using a sweep rate of 0.1 V.s<sup>-1</sup>.**

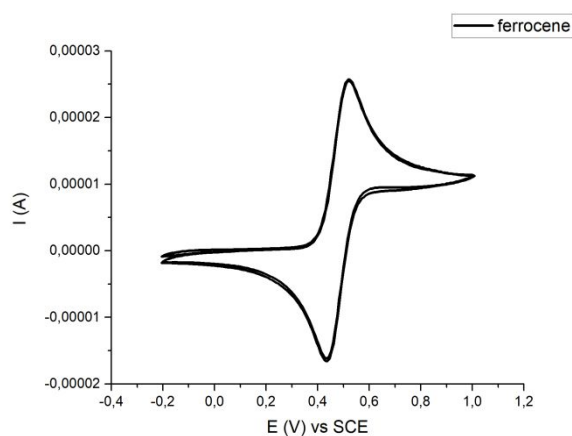

**Figure SI12: CV of Ferrocene performed in 0.1 M Bu<sub>4</sub>NPF<sub>6</sub>/CH<sub>3</sub>CN using a sweep rate of 0.1 V.s<sup>-1</sup>.**

### Molecular orbitals of monomer units: B3LYP calculations

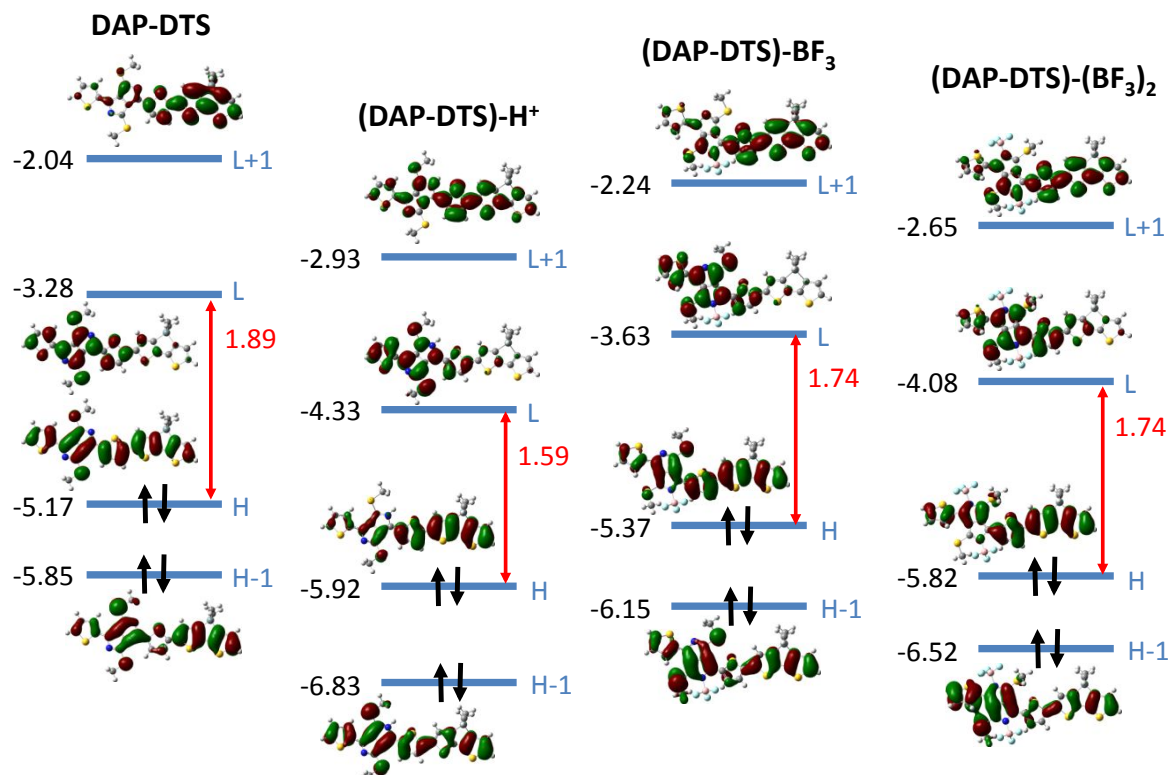

**Figure SI13:** Frontier energy levels (with energy values in eV) and molecular orbital shapes of DAP-DTS, (DAP-DTS)-H<sup>+</sup>, (DAP-DTS)-BF<sub>3</sub> and (DAP-DTS)-(BF<sub>3</sub>)<sub>2</sub> monomers, calculated at the IEFPCM:B3LYP/6-311G(d) level in chloroform.

### Bond length alternation

The bond length alternation (BLA) of DAP-DTS monomers has been calculated along the conjugated chain highlighted in red in Figure SI14, using the following expression:

$$BLA_{1\dots N} = 1/(N-2) \sum_{i=1}^{N-2} \{(d_{i+1,i+2} - d_{i,i+1}) \times (-1)^{i+1}\}$$

where  $N$  is the number of carbon atoms within the conjugated segment, and  $d_{i,j}$  is the interatomic distance between carbons  $i$  and  $j$ .

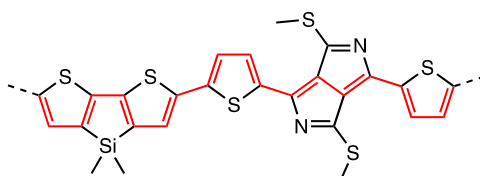

**Figure SI14:** Structure of the DAP-DTS monomer and (in red) conjugated chain used for calculating the bond length alternation.



### *Electronic and optical properties of increasingly large oligomers*

Table SI1: Frontier orbital energies and electronic gap ( $E_g = E_{\text{LUMO}} - E_{\text{HOMO}}$ , all values in eV), as well as  $S_0 \rightarrow S_1$  transition energies ( $\Delta E_{01}$ , eV), wavelengths ( $\lambda_{01}$ , nm) and oscillator strengths ( $f_{01}$ , dimensionless), calculated at the IEF-PCM:M06-2X/6-311G(d) level in chloroform for increasingly large DAP-DTS oligomers.

| <b>N units</b> | <b><math>E_{\text{HOMO}}</math></b> | <b><math>E_{\text{LUMO}}</math></b> | <b><math>E_g</math></b> | <b><math>\Delta E_{01}</math></b> | <b><math>\lambda_{01}</math></b> | <b><math>f_{01}</math></b> |
|----------------|-------------------------------------|-------------------------------------|-------------------------|-----------------------------------|----------------------------------|----------------------------|
| <b>1</b>       | -6.336                              | -2.802                              | 3.535                   | 1.958                             | 633                              | 1.336                      |
| <b>2</b>       | -6.095                              | -2.923                              | 3.173                   | 1.737                             | 714                              | 2.962                      |
| <b>3</b>       | -6.066                              | -2.962                              | 3.104                   | 1.712                             | 724                              | 4.529                      |
| <b>4</b>       | -6.046                              | -2.982                              | 3.064                   | 1.694                             | 732                              | 6.084                      |
| <b>5</b>       | -6.044                              | -2.988                              | 3.056                   | 1.694                             | 732                              | 7.710                      |

Table SI2: Frontier orbital energies and electronic gap ( $E_g = E_{\text{LUMO}} - E_{\text{HOMO}}$ , all values in eV), as well as  $S_0 \rightarrow S_1$  transition energies ( $\Delta E_{01}$ , eV), wavelengths ( $\lambda_{01}$ , nm) and oscillator strengths ( $f_{01}$ , dimensionless), calculated at the IEF-PCM:M06-2X/6-311G(d) level in chloroform for increasingly large (DAP-DTS)-H<sup>+</sup> oligomers.

| <b>N units</b> | <b><math>E_{\text{HOMO}}</math></b> | <b><math>E_{\text{LUMO}}</math></b> | <b><math>E_g</math></b> | <b><math>\Delta E_{01}</math></b> | <b><math>\lambda_{01}</math></b> | <b><math>f_{01}</math></b> |
|----------------|-------------------------------------|-------------------------------------|-------------------------|-----------------------------------|----------------------------------|----------------------------|
| <b>1</b>       | -7.010                              | -3.915                              | 3.095                   | 1.748                             | 710                              | 1.395                      |
| <b>2</b>       | -6.986                              | -4.169                              | 2.817                   | 1.540                             | 805                              | 2.953                      |
| <b>3</b>       | -7.032                              | -4.322                              | 2.710                   | 1.506                             | 823                              | 4.788                      |
| <b>4</b>       | -7.071                              | -4.426                              | 2.646                   | 1.487                             | 834                              | 6.927                      |
| <b>5</b>       | -7.105                              | -4.487                              | 2.618                   | 1.487                             | 834                              | 7.784                      |

Table SI3: Frontier orbital energies and electronic gap ( $E_g = E_{\text{LUMO}} - E_{\text{HOMO}}$ , all values in eV), as well as  $S_0 \rightarrow S_1$  transition energies ( $\Delta E_{01}$ , eV), wavelengths ( $\lambda_{01}$ , nm) and oscillator strengths ( $f_{01}$ , dimensionless), calculated at the IEF-PCM:M06-2X/6-311G(d) level in chloroform for increasingly large (DAP-DTS)-BF<sub>3</sub> oligomers.

| <b>N units</b> | <b><math>E_{\text{HOMO}}</math></b> | <b><math>E_{\text{LUMO}}</math></b> | <b><math>E_g</math></b> | <b><math>\Delta E_{01}</math></b> | <b><math>\lambda_{01}</math></b> | <b><math>f_{01}</math></b> |
|----------------|-------------------------------------|-------------------------------------|-------------------------|-----------------------------------|----------------------------------|----------------------------|
| <b>1</b>       | -6.561                              | -3.118                              | 3.443                   | 1.965                             | 631                              | 1.087                      |
| <b>2</b>       | -6.377                              | -3.229                              | 3.148                   | 1.751                             | 708                              | 2.503                      |
| <b>3</b>       | -6.333                              | -3.272                              | 3.061                   | 1.710                             | 725                              | 3.840                      |
| <b>4</b>       | -6.319                              | -3.291                              | 3.028                   | 1.692                             | 733                              | 5.433                      |

Table SI4: Frontier orbital energies and electronic gap ( $E_g = E_{\text{LUMO}} - E_{\text{HOMO}}$ , all values in eV), as well as  $S_0 \rightarrow S_1$  transition energies ( $\Delta E_{01}$ , eV), wavelengths ( $\lambda_{01}$ , nm) and oscillator strengths ( $f_{01}$ , dimensionless), calculated at the IEF-PCM:M06-2X/6-311G(d) level in chloroform for increasingly large (DAP-DTS)-(BF<sub>3</sub>)<sub>2</sub> oligomers.

| <b>N units</b> | <b><math>E_{\text{HOMO}}</math></b> | <b><math>E_{\text{LUMO}}</math></b> | <b><math>E_g</math></b> | <b><math>\Delta E_{01}</math></b> | <b><math>\lambda_{01}</math></b> | <b><math>f_{01}</math></b> |
|----------------|-------------------------------------|-------------------------------------|-------------------------|-----------------------------------|----------------------------------|----------------------------|
| <b>1</b>       | -6.887                              | -3.638                              | 3.249                   | 1.771                             | 700                              | 1.460                      |
| <b>2</b>       | -6.507                              | -3.613                              | 2.894                   | 1.541                             | 805                              | 2.545                      |
| <b>3</b>       | -6.459                              | -3.681                              | 2.778                   | 1.501                             | 826                              | 4.334                      |
| <b>4</b>       | -6.448                              | -3.746                              | 2.702                   | 1.470                             | 844                              | 5.792                      |

### *Khun fit parameters*

Table SI5: Optimized values of the Kuhn fit parameters  $D_k$  and  $E_1$  (eV), as calculated at the IEF-PCM:M06-2X/6-311G(d) level in chloroform.

| <b>Polymer</b>                             | <b><math>D_k</math></b> | <b><math>E_1</math></b> |
|--------------------------------------------|-------------------------|-------------------------|
| P(DAP-DTS)                                 | -0.903                  | 5.343                   |
| P(DAP-DTS)-H <sup>+</sup>                  | -0.913                  | 4.956                   |
| P(DAP-DTS)-BF <sub>3</sub>                 | -0.905                  | 5.419                   |
| P(DAP-DTS)-(BF <sub>3</sub> ) <sub>2</sub> | -0.924                  | 5.265                   |

**Relative energies of (DAP-DTS)-H<sup>+</sup> and (DAP-DTS)-BF<sub>3</sub> dimers**

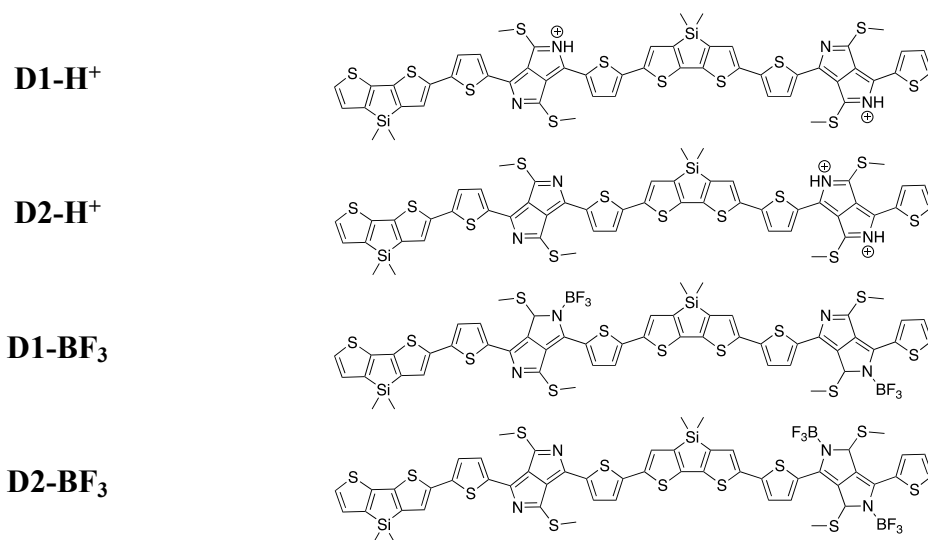

**Figure SI15: Chemical structures of (DAP-DTS)-X (X = H<sup>+</sup> or BF<sub>3</sub>) dimers, with X groups located on different (D1) or on the same (D2) DAP unit.**

Table SI5: Electronic (E, a.u.) and Gibbs' energies (G, a.u.), as well as relative energy values ( $\Delta E$  and  $\Delta G$ , in kcal/mol) of (DAP-DTS)-X structures, calculated at the M06-2X/6-311G(d) level.

|                          | <b>E</b>     | <b><math>\Delta E</math></b> | <b>G</b>     | <b><math>\Delta G</math></b> |
|--------------------------|--------------|------------------------------|--------------|------------------------------|
| <b>D1-H<sup>+</sup></b>  | -7580.906546 | /                            | -7580.239106 | /                            |
| <b>D2-H<sup>+</sup></b>  | -7580.861959 | 28.09                        | -7580.195378 | 27.54                        |
| <b>D1-BF<sub>3</sub></b> | -8229.316951 | /                            | -8228.651094 | /                            |
| <b>D2-BF<sub>3</sub></b> | -8229.306774 | 6.41                         | -8228.639445 | 7.34                         |

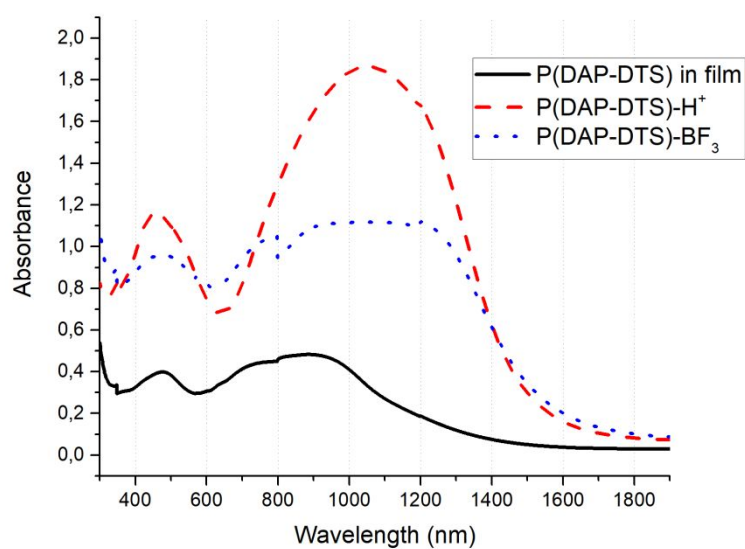

**Figure SI16: UV-visible Absorption spectra of P(DAP-DTS) films.**

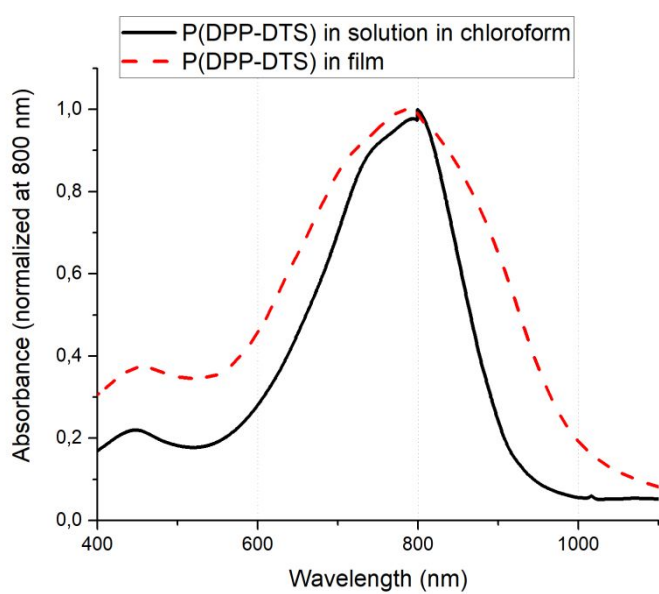

**Figure SI17: UV-visible Absorption spectra of P(DPP-DTS).**

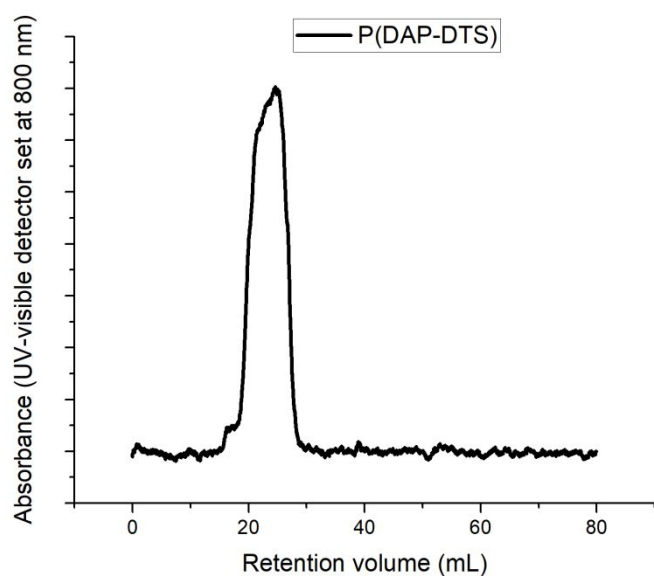

**Figure SI18: Size exclusion chromatography of P(DPP-DTS).**

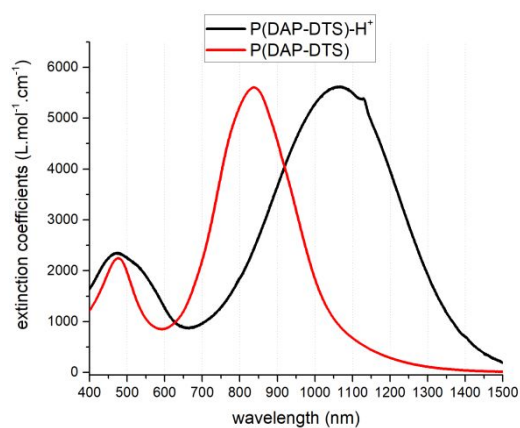

**Figure SI19: Absorption electronic spectra of P(DAP-DTS) and P(DAP-DTS) using an excess of HCl in chloroform at RT.**
